# Supplementary material for: New tris-3,4-HOPO lanthanide complexes as potential imaging probes: complex stability and magnetic properties
Source: Royal Society of Chemistry journal article supplement (doi:10.1039/c2dt32237d), 2012-11-29
Supplement: c2dt32237d.pdf [file c2dt32237d.pdf]

## Supplementary Information

### **New Tris-3,4-HOPO lanthanide complexes as potential imaging probes: complex stability and magnetic properties**

Ana C. Mendonça,<sup>a</sup> André F. Martins,<sup>b,c,d</sup> Andrea Melchior,<sup>e</sup> Sérgio M. Marques,<sup>a</sup> Sílvia Chaves,<sup>a</sup> Sandrine Villette,<sup>d</sup> Stéphane Petoud,<sup>d</sup> Pier Luigi Zanonato,<sup>f</sup> Marilena Tolazzi,<sup>e</sup> Célia S. Bonnet,<sup>d</sup> Éva Tóth,<sup>d</sup> Plinio Di Bernardo,<sup>f</sup> Carlos F.G.C. Geraldes<sup>b,c,g</sup> and M. Amélia Santos<sup>a</sup>

<sup>a</sup>*Centro de Química Estrutural, Instituto Superior Técnico, Universidade Técnica de Lisboa, Av. Rovisco Pais 1, 1049-001 Lisboa, Portugal.*

<sup>b</sup>*Department of Life Sciences, Faculty of Science and Technology, University of Coimbra, P.O. Box 3046, 3001-401 Coimbra, Portugal.*

<sup>c</sup>*Center of Neurosciences and Cell Biology, Largo Marquês de Pombal, University of Coimbra, Portugal*

<sup>d</sup>*Coimbra Chemistry Center, Rua Larga, University of Coimbra, 3004-535 Coimbra, Portugal*

<sup>e</sup>*Centre de Biophysique Moléculaire, CNRS, Rue Charles Sadron, 45071 Orléans, France.*

<sup>f</sup>*Dipartimento di Scienze Chimiche, Università di Padova, Via Marzolo 1, 35131 Padova, Italy*

<sup>g</sup>*Dipartimento di Chimica, Fisica e Ambiente, Università di Udine, Via del Cotonificio 108, 33100 Udine, Italy*

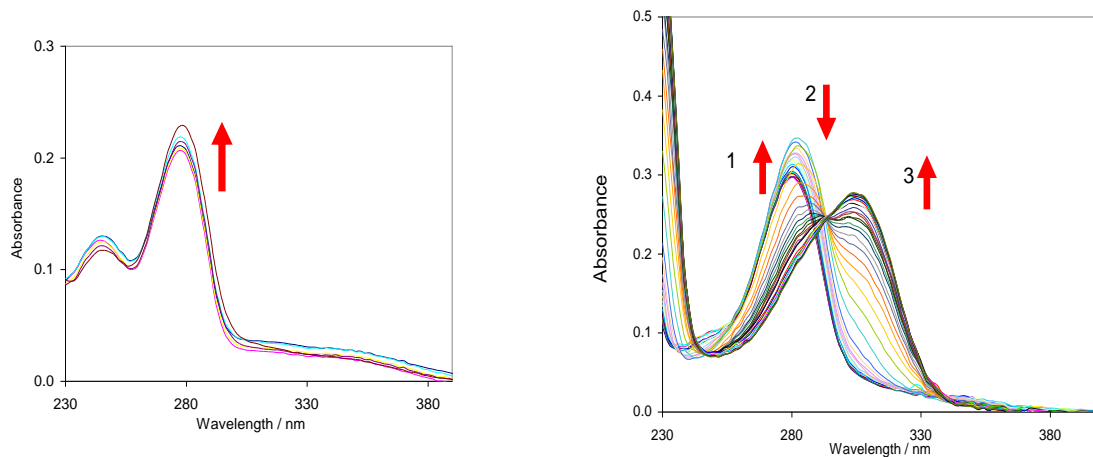

(a)

(b)

**Figure S1.** UV-Vis absorption spectra variations of the ligand solutions ( $C_{L, \text{start}} = 1.3 \times 10^{-5} \text{ M}$ ) along the titration with acid (HCl 0.1 M) or base (KOH 0.1M) in the ranges of pH 0.98-2.36 (a) and 3.19-10.6 (b). In (a) the red arrow indicates the (small) increase of absorbance on going from pH 0.98 to 2.36. In (b) arrow 1 indicates an increase of absorbance (pH ~3-5) at 280 nm followed by nearly constant values corresponding to a large pH change and a sharp decrease (arrow 2) at pH > 9. Arrow 3 evidences the marked increase of absorbance at 304 nm at pH > 9 corresponding to the decrease of absorbance at 280 nm. Data at 244, 280 and 304 nm are plotted in Figure 3.

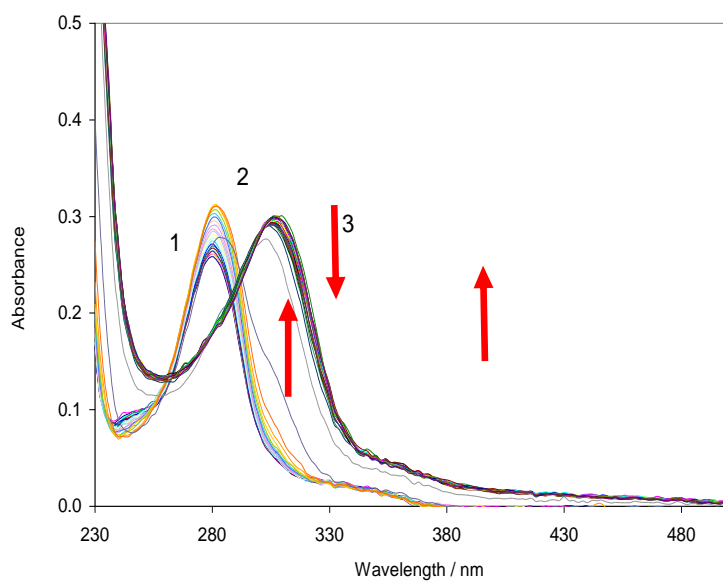

**Figure S2.** UV-Vis absorption spectra variations of a solution of the ligand L in the presence of  $\text{La}^{3+}$ , along the titration with base (pH = 3.07-10.6,  $C_L = 1.3 \times 10^{-5}$  M,  $C_L/C_{\text{La}^{3+}} = 1.01$ ).

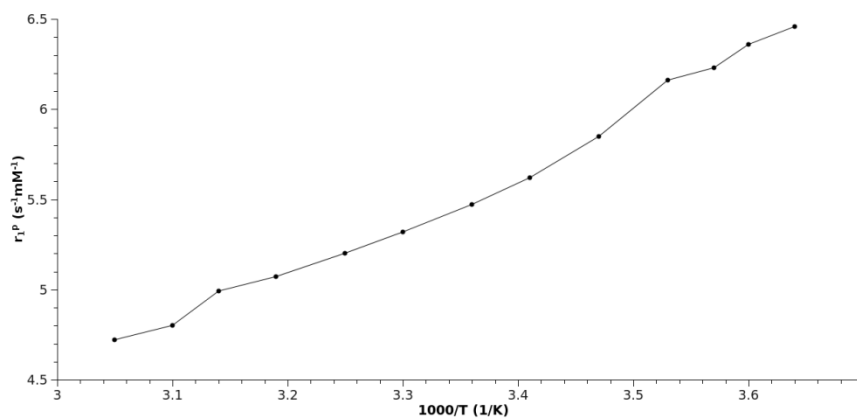

**Figure S3.** Temperature dependence of the  $r_1$  (20 MHz) relaxivity of the complex Gd-(NTP(PrHP)<sub>3</sub>) at pH 7.1.

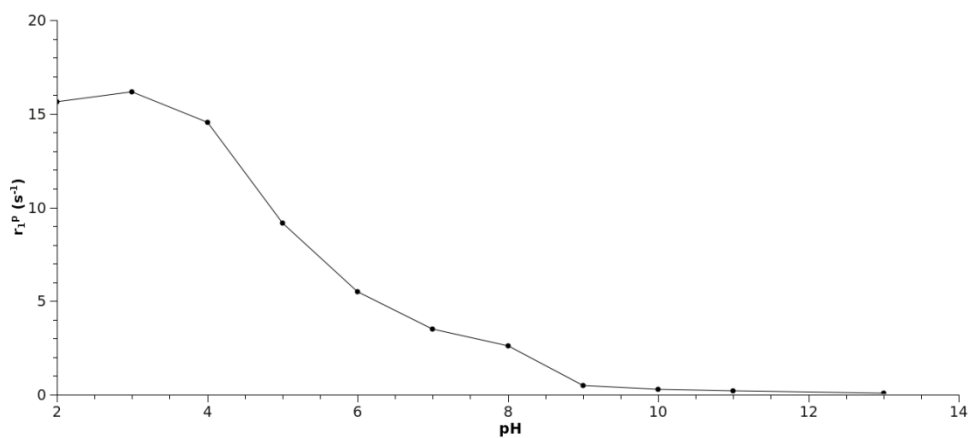

**Figure S4.** pH dependence of the  $r_1$  (20 MHz) relaxivity of the complex Gd-(NTP(PrHP)<sub>3</sub>) at 37°C.

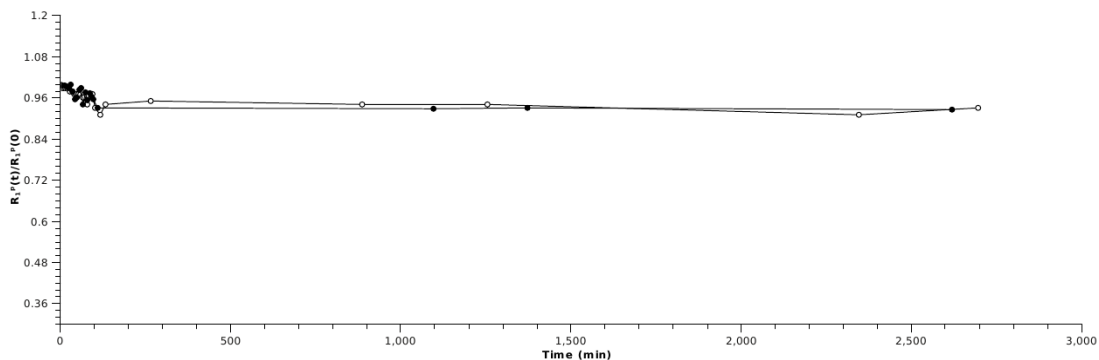

**Figure S5.** Evolution of the relative water proton paramagnetic relaxation rate  $R_1^p(t)/R_1^p(0)$  (20 MHz, pH 7.1, 37 °C) versus time for 0.75 mM Gd-(NTP(PrHP)<sub>3</sub>), in 10 mM phosphate buffer solution, in the absence (empty circles) and in the presence (full circles) of an equimolar amount of Zn<sup>2+</sup> ions.

**Table S1.** Stability constants for formation of  $Zn^{2+}$  - L complexes,  $Zn_mH_hL_l$  (25 °C,  $I = 0.1$  M KCl)

| $\log \beta_{mhl}$ | $\log \beta_{151}$ | $\log \beta_{141}$ | $\log \beta_{131}$ | $\log \beta_{121}$ | $\log \beta_{111}$ | $\log \beta_{302}$ |
|--------------------|--------------------|--------------------|--------------------|--------------------|--------------------|--------------------|
| $Zn^{2+}$ -L       | 42.87±0.05         | 38.46±0.05         | 34.02±0.07         | 29.26±0.09         | 22.11±0.08         | 38.92±0.06         |

**Table S2.** Initial volume and concentrations of the reagents in cell. Titrant: KOH 51.71 mM for all titrations.  $V_f = V$  added final before precipitation occurred.

| Titration | V, mL | $C_L$ , mM | $C_M$ , mM | $C_H$ , mM | $V_f$ , mL |
|-----------|-------|------------|------------|------------|------------|
| H_1       | 85.0  | 0.2036     | ---        | 7.112      |            |
| H_2       | 25.5  | 0.5851     | ---        | 9.004      |            |
| H_3       | 4.924 | 2.098      | ---        | 17.77      |            |
| La_1      | 25.50 | 0.398      | 0.375      | 8.538      | 3.92       |
| La_2      | 25.50 | 0.4069     | 0.1819     | 8.346      | 3.60       |
| La_3      | 4.092 | 1.090      | 0.3736     | 17.389     | 1.40       |
| Pr_1      | 25.50 | 0.3966     | 0.369      | 8.529      | 3.94       |
| Pr_2      | 25.5  | 0.3729     | 0.183      | 8.306      | 3.60       |
| Pr_3      | 4.890 | 1.072      | 0.334      | 17.793     | 1.40       |
| Gd_1      | 25.50 | 0.378      | 0.371      | 8.501      | 3.84       |
| Gd_2      | 25.50 | 0.3719     | 0.1863     | 8.3013     | 3.52       |
| Gd_3      | 4.894 | 1.078      | 0.331      | 17.950     | 1.42       |
| Er_1      | 25.50 | 0.3899     | 0.3702     | 8.376      | 3.80       |
| Er_2      | 25.50 | 0.2586     | 0.1857     | 7.627      | 3.40       |
| Er_3      | 4.925 | 1.087      | 0.3270     | 17.712     | 1.44       |
| Lu_1      | 25.50 | 0.3940     | 0.3769     | 8.477      | 3.84       |
| Lu_2      | 25.50 | 0.3950     | 0.182      | 8.394      | 3.56       |
| Lu_3      | 4.876 | 1.104      | 0.351      | 18.120     | 1.40       |

## Equations used for the analysis of $^{17}\text{O}$ NMR and NMRD data

NMRD and  $^{17}\text{O}$  NMR data have been analysed within the framework of the Solomon-Bloembergen-Morgan theory.

### $^{17}\text{O}$ NMR spectroscopy

From the measured  $^{17}\text{O}$  NMR relaxation rates and angular frequencies of the paramagnetic solutions,  $1/T_2$  and  $\omega$ , and of the acidified water reference,  $1/T_{2A}$  and  $\omega_A$ , one can calculate the reduced relaxation rates and chemical shifts,  $1/T_{2r}$  and  $\Delta\omega_r$ , which may be written as in Equations (A1)-(A2), where,  $1/T_{2m}$  is the relaxation rate of the bound water and  $\Delta\omega_m$  is the chemical shift difference between bound and bulk water,  $\tau_m$  is the mean residence time or the inverse of the water exchange rate  $k_{ex}$  and  $P_m$  is the mole fraction of the bound water.<sup>1,2</sup>

$$\frac{1}{T_{2r}} = \frac{1}{P_m} \left[ \frac{1}{T_2} - \frac{1}{T_{2A}} \right] = \frac{1}{\tau_m} \frac{T_{2m}^{-2} + \tau_m^{-1} T_{2m}^{-1} + \Delta\omega_m^2}{(\tau_m^{-1} + T_{2m}^{-1})^2 + \Delta\omega_m^2} + \frac{1}{T_{2os}} \quad (\text{A1})$$

$$\Delta\omega_r = \frac{1}{P_m} (\omega - \omega_A) = \frac{\Delta\omega_m}{(1 + \tau_m T_{2m}^{-1})^2 + \tau_m^2 \Delta\omega_m^2} + \Delta\omega_{os} \quad (\text{A2})$$

Previous studies have shown that outer sphere contributions to the  $^{17}\text{O}$  relaxation rates are negligible.<sup>3</sup>

In equation (A2) the chemical shift of the bound water molecule,  $\Delta\omega_m$ , depends on the hyperfine interaction between the  $\text{Gd}^{3+}$  electron spin and the  $^{17}\text{O}$  nucleus and is directly proportional to the scalar coupling constant,  $\frac{A}{\hbar}$ , as expressed in Equation (A3).<sup>4</sup>

$$\Delta\omega_m = \frac{g_L \mu_B S(S+1) B A}{3k_B T \hbar} \quad (\text{A3})$$

The isotopic Landé  $g$  factor is equal to 2.0 for the  $\text{Gd}^{3+}$ ,  $B$  represents the magnetic field, and  $k_B$  is the Boltzmann constant.

The outer-sphere contribution to the chemical shift is assumed to be linearly related to  $\Delta\omega_m$  by a constant  $C_{os}$  [Equation (A4)].<sup>5</sup>

$$\Delta\omega_{os} = C_{os} \Delta\omega_m \quad (\text{A4})$$

In the transverse relaxation, the scalar contribution,  $1/T_{2sc}$ , is the most important [Equation (A9)].  $1/\tau_{s1}$  is the sum of the exchange rate constant and the electron spin relaxation rate.

$$\frac{1}{T_{2m}} = \frac{1}{T_{2sc}} = \frac{S(S+1)}{3} \left( \frac{A}{\hbar} \right)^2 \tau_{sl} \quad (\text{A5})$$

$$\frac{1}{\tau_{sl}} = \frac{1}{\tau_m} + \frac{1}{T_{1e}} \quad (\text{A6})$$

The exchange rate is supposed to obey the Eyring equation. In equation (A7)  $\Delta S^\ddagger$  and  $\Delta H^\ddagger$  are the entropy and enthalpy of activation for the water exchange process, and  $k_{ex}^{298}$  is the exchange rate at 298.15 K.

$$\frac{1}{\tau_m} = k_{ex} = \frac{k_B T}{h} \exp \left\{ \frac{\Delta S^\ddagger}{R} - \frac{\Delta H^\ddagger}{RT} \right\} = \frac{k_{ex}^{298} T}{298.15} \exp \left\{ \frac{\Delta H^\ddagger}{R} \left( \frac{1}{298.15} - \frac{1}{T} \right) \right\} \quad (\text{A7})$$

### NMRD

The measured longitudinal proton relaxation rate,  $R_1^{obs} = 1/T_1^{obs}$ , is the sum of a paramagnetic and a diamagnetic contribution as expressed in Equation (A12), where  $r_l$  is the proton relaxivity:

$$R_1^{obs} = R_1^d + R_1^p = R_1^d + r_l [Gd^{3+}] \quad (\text{A8})$$

The relaxivity can be divided into an inner and an outer sphere term as follows:

$$r_l = r_{1is} + r_{1os} \quad (\text{A9})$$

The inner sphere term is given in Equation (A14), where  $q$  is the number of inner sphere water molecules.<sup>6</sup>

$$r_{1is} = \frac{1}{1000} \times \frac{q}{55.55} \times \frac{1}{T_{1m}^H + \tau_m} \quad (\text{A10})$$

The longitudinal relaxation rate of inner sphere protons,  $1/T_{1m}^H$  is expressed by Equation (A11), where  $r_{GdH}$  is the effective distance between the electron charge and the  $^1\text{H}$  nucleus,  $\omega_l$  is the proton resonance frequency and  $\omega_s$  is the Larmor frequency of the  $\text{Gd}^{3+}$  electron spin.

$$\frac{1}{T_{1m}^H} = \frac{2}{15} \left( \frac{\mu_0}{4\pi} \right)^2 \frac{\hbar^2 \gamma_l^2 \gamma_s^2}{r_{GdH}^6} S(S+1) \times [3J(\omega_l; \tau_{d1}) + 7J(\omega_s; \tau_{d2})] \quad (\text{A11})$$



$$\frac{1}{T_{1e}} = \frac{1}{T_{1e}} + \frac{1}{T_{1e}} + \frac{1}{T_{1e}} \quad \text{for } i=1,2 \quad (\text{A12})$$

where  $\tau_{RH}$  is the rotational correlation time of the Gd-H<sub>water</sub> vector.

The rotational correlation time,  $\tau_{RH}$  is assumed to have simple exponential temperature dependence with an  $E_R$  activation energy as given in equation (A13).

$$\tau_{RH} = \tau_{RH} \exp\left(\frac{E_R}{RT}\right) \quad (\text{A13})$$

The outer-sphere contribution can be described by Equation (A14) where  $N_A$  is the Avogadro constant, and  $J_{os}$  is its associated spectral density function as given by Equation (A15).<sup>8,9</sup>

$$r_{1os} = \frac{32N_A\pi}{405} \left(\frac{\mu_0}{4\pi}\right)^2 \frac{\hbar^2\gamma_S^2\gamma_I^2}{a_{GdH}D_{GdH}} S(S+1) [3J_{os}(\omega_I, T_{1e}) + 7J_{os}(\omega_S, T_{2e})] \quad (\text{A14})$$

$$J_{os}(\omega, T_{je}) = \text{Re} \left[ \frac{1 + 14 \left( i\omega\alpha_{GdH} + \frac{\tau_{GdH}}{T_{je}} \right)^{1/2}}{1 + \left( i\omega\alpha_{GdH} + \frac{\tau_{GdH}}{T_{je}} \right)^{1/2} + 49 \left( i\omega\alpha_{GdH} + \frac{\tau_{GdH}}{T_{je}} \right) + 19 \left( i\omega\alpha_{GdH} + \frac{\tau_{GdH}}{T_{je}} \right)^{3/2}} \right] \quad (\text{A15})$$

$j = 1,2$

The longitudinal and transverse electronic relaxation rates,  $1/T_{1e}$  and  $1/T_{2e}$  are expressed by Equation (A16)-(A17), where  $\tau_v$  is the electronic correlation time for the modulation of the zero-field-splitting interaction,  $E_v$  the corresponding activation energy and  $\Delta^2$  is the mean square zero-field-splitting energy. We assumed a simple exponential dependence of  $\tau_v$  versus  $1/T$  as written in Equation (A18).

$$\left(\frac{1}{T_{1e}}\right)^{ZFS} = \frac{1}{25} \Delta^2 \tau_v \{4S(S+1) - 3\} \left( \frac{1}{1 + \omega_S^2 \tau_v^2} + \frac{4}{1 + 4\omega_S^2 \tau_v^2} \right) \quad (\text{A16})$$

$$\left(\frac{1}{T_{2e}}\right)^{ZFS} = \Delta^2 \tau_v \left( \frac{5.26}{1 + 0.372\omega_S^2 \tau_v^2} + \frac{7.18}{1 + 1.24\omega_S^2 \tau_v^2} \right) \quad (\text{A17})$$

$$\tau_v = \tau_v^{298} \exp \left[ \frac{E_v}{R} \left( \frac{1}{T} - \frac{1}{298.15} \right) \right] \quad (\text{A18})$$

The diffusion coefficient for the diffusion of a water proton away from a  $\text{Gd}^{\text{III}}$  complex,  $D_{\text{GdH}}$ , is assumed to obey an exponential law versus the inverse of the temperature, with an activation energy  $E_{D_{\text{GdH}}}$ , as given in Equation (A19).  $D_{\text{GdH}}^{298}$  is the diffusion coefficient at 298.15K.

$$D_{\text{GdH}} = D_{\text{GdH}}^{298} \exp \left\{ \frac{E_{\text{GdH}}}{R} \left( \frac{1}{298.15} - \frac{1}{T} \right) \right\} \quad (\text{A19})$$

### ***References for Equations***

- 1 T. J. Swift, R. E. Connick, *J. Chem. Phys.*, 1962, **37**, 307-320.
- 2 J. R. Zimmermann, W. E. Brittain, *J. Phys. Chem.*, 1957, **61**, 1328-1333.
- 3 K. Micskei, L. Helm, E. Brücher, A. E. Merbach, *Inorg. Chem.*, 1993, **32**, 3844-3850.
- 4 H. G. Brittain, J. F. Desreux, *Inorg. Chem.*, 1984, **23**, 4459-4466.
- 5 G. Gonzalez, H. D. Powell, V. Tissières, A. E. Merbach, *J. Phys. Chem.*, 1994, **98**, 53-59.
- 6 Z. Luz, S. Meiboom, *J. Chem. Phys.*, 1964, **40**, 2686-2692.
- 7 F. A. Dunand, A. Borel, A. E. Merbach, *J. Am. Chem. Soc.*, 2002, **124**, 710-716.
- 8 J. H. Freed, *J. Chem. Phys.*, 1978, **68**, 4034-4037.
- 9 S. H. Koenig, R. D. Brown III, *Prog. Nucl. Magn Reson. Spectrosc.*, 1991, **22**, 487-567.
